# Supplementary material
Source: PubMed Central journal article supplement (PMC6437472)
Supplement: AAC.02489-18-s0001.pdf [file AAC.02489-18-s0001.pdf]

**Pharmacokinetics of albendazole, albendazole sulfoxide and albendazole sulfone determined from plasma, blood, dried blood spots and Mitra<sup>®</sup> samples of hookworm-infected adolescents**

Jessica D. Schulz<sup>a,b</sup>, Anna Neodo<sup>a,b</sup>, Jean T. Coulibaly<sup>a,b,c,d</sup>, Jennifer Keiser<sup>a,b,\*</sup>

**Table S1.** Gradient elution of liquid chromatography.

| Time [min] | Mobile phase B [%] | Flow rate [mL/min] | Column          |
|------------|--------------------|--------------------|-----------------|
| 0.00       | 2                  | 0.3                | Trapping system |
| 1.50       | 70                 | 0.3                |                 |
| 1.51       | 70                 | 0.6                | Main column     |
| 3.00       | 70                 | 0.7                |                 |
| 5.50       | 95                 | 0.7                |                 |
| 6.00       | 95                 | 0.7                |                 |
| 6.20       | 70                 | 0.7                |                 |
| 7.20       | 70                 | 0.7                |                 |
| 7.21       | 2                  | 1                  | Trapping system |
| 8.20       | 2                  | 1                  |                 |

**Table S2.** Fragment specific mass spectrometry parameters of albendazole (ALB), albendazole sulfoxide (ALBOX), albendazole sulfone (ALBON) and deuterated ALB (ALB-d<sub>3</sub>).

| Parameter                | Product ion 234 | Product ion 240 | Product ion 159 | Product ion 234    |
|--------------------------|-----------------|-----------------|-----------------|--------------------|
|                          | ALB             | ALBOX           | ALBON           | ALB-d <sub>3</sub> |
| Dwell                    | 10              | 50              | 50              | 50                 |
| Fragmentor voltage       | 99              | 90              | 90              | 90                 |
| Collision Energy         | 20              | 12              | 40              | 20                 |
| Cell accelerator voltage | 5               | 5               | 5               | 5                  |

**Table S3.** Stability of albendazole (ALB), albendazole sulfone (ALBON) and albendazole sulfoxide (ALBOX) in plasma, blood, DBS and Mitra®.

| Condition                               | Matrix              | Analyte | C <sub>nominal</sub><br>[ng/mL] | C <sub>ø</sub><br>[ng/mL] | Accuracy ±<br>CV [%] |             |
|-----------------------------------------|---------------------|---------|---------------------------------|---------------------------|----------------------|-------------|
| Room<br>temperature<br>(4 h, extracted) | Plasma<br>extracted | ALB     | 5                               | 4.64                      | 92.8 ± 0.81          |             |
|                                         |                     |         | 100                             | 99.6                      | 99.6 ± 0.91          |             |
|                                         |                     |         | 150                             | 159                       | 106 ± 0.56           |             |
|                                         |                     | ALBON   | 5                               | 4.68                      | 93.6 ± 6.11          |             |
|                                         |                     |         | 100                             | 100                       | 100 ± 1.07           |             |
|                                         |                     |         | 150                             | 164                       | 109 ± 1.81           |             |
|                                         |                     |         | ALBOX                           | 10                        | 9.76                 | 97.6 ± 4.15 |
|                                         |                     |         |                                 | 500                       | 505                  | 101 ± 0.63  |
|                                         |                     |         |                                 | 750                       | 746                  | 99.5 ± 2.95 |
|                                         | Blood<br>extracted  | ALB     | 5                               | 4.67                      | 93.4 ± 1.08          |             |
|                                         |                     |         | 100                             | 96.6                      | 96.6 ± 1.80          |             |
|                                         |                     |         | 150                             | 141                       | 93.8 ± 4.36          |             |
|                                         |                     | ALBON   | 5                               | 5.00                      | 100 ± 2.01           |             |
|                                         |                     |         | 100                             | 102                       | 102 ± 3.53           |             |
|                                         |                     |         | 150                             | 140                       | 93.6 ± 5.77          |             |
| ALBOX                                   |                     |         | 10                              | 10.1                      | 101 ± 1.09           |             |
|                                         |                     |         | 500                             | 496                       | 99.1 ± 3.54          |             |
|                                         |                     |         | 750                             | 691                       | 92.1 ± 5.34          |             |
| Room<br>temperature<br>(2 months)       | DBS                 | ALB     | 10                              | 9.59                      | 95.9 ± 3.94          |             |
|                                         |                     |         | 100                             | 105                       | 105 ± 5.88           |             |
|                                         |                     |         | 150                             | 153                       | 102 ± 5.78           |             |
|                                         |                     | ALBON   | 5                               | 5.04                      | 101 ± 5.43           |             |
|                                         |                     |         | 100                             | 104                       | 104 ± 6.71           |             |
|                                         |                     |         | 150                             | 162                       | 108 ± 3.88           |             |
|                                         |                     |         | ALBOX                           | 10                        | 10.7                 | 107 ± 1.77  |
|                                         |                     |         |                                 | 500                       | 504                  | 101 ± 2.56  |
|                                         |                     |         |                                 | 750                       | 759                  | 101 ± 6.49  |
|                                         | Mitra®              | ALB     | 10                              | 10.0                      | 100 ± 3.23           |             |
|                                         |                     |         | 100                             | 101                       | 101 ± 3.69           |             |
|                                         |                     |         | 150                             | 148                       | 98.8 ± 1.88          |             |
|                                         |                     | ALBON   | 5                               | 5.01                      | 100 ± 5.01           |             |
|                                         |                     |         | 100                             | 104                       | 104 ± 5.14           |             |
|                                         |                     |         | 150                             | 146                       | 97.1 ± 4.02          |             |
| ALBOX                                   |                     |         | 10                              | 9.83                      | 98.3 ± 4.81          |             |
|                                         |                     |         | 500                             | 485                       | 97.1 ± 4.55          |             |
|                                         |                     |         | 750                             | 732                       | 97.6 ± 4.94          |             |
| 4 °C<br>(72 h,<br>extracted)            | Plasma              | ALB     | 5                               | 4.97                      | 99.4 ± 4.43          |             |
|                                         |                     |         | 100                             | 100                       | 100 ± 1.25           |             |
|                                         |                     |         | 150                             | 153                       | 102 ± 1.73           |             |
|                                         |                     | ALBON   | 5                               | 4.91                      | 98.3 ± 2.36          |             |
|                                         |                     |         | 100                             | 95.0                      | 95.0 ± 2.35          |             |
|                                         |                     |         | 150                             | 153                       | 102 ± 4.35           |             |
|                                         |                     |         | ALBOX                           | 10                        | 11.0                 | 110 ± 4.14  |
|                                         |                     |         |                                 | 500                       | 483                  | 96.6 ± 3.85 |
|                                         |                     |         |                                 | 750                       | 725                  | 96.7 ± 4.78 |

|                        |        |       |      |             |             |
|------------------------|--------|-------|------|-------------|-------------|
|                        | Blood  | ALB   | 5    | 5.17        | 103 ± 4.48  |
|                        |        |       | 100  | 100         | 100 ± 1.89  |
|                        |        |       | 150  | 158         | 105 ± 1.26  |
|                        |        | ALBON | 5    | 5.01        | 100 ± 4.81  |
|                        |        |       | 100  | 100         | 100 ± 1.82  |
|                        |        |       | 150  | 166         | 110 ± 1.59  |
|                        |        | ALBOX | 10   | 9.85        | 98.5 ± 4.44 |
|                        |        |       | 500  | 517         | 103 ± 3.39  |
|                        |        |       | 750  | 821         | 109 ± 2.23  |
|                        | DBS    | ALB   | 10   | 10.3        | 103 ± 6.54  |
|                        |        |       | 100  | 97.6        | 97.6 ± 5.93 |
|                        |        |       | 150  | 144         | 96.0 ± 6.60 |
|                        |        | ALBON | 5    | 5.29        | 106 ± 7.17  |
|                        |        |       | 100  | 97.8        | 97.8 ± 4.01 |
|                        |        |       | 150  | 158         | 105 ± 4.63  |
|                        |        | ALBOX | 10   | 10.6        | 106 ± 7.70  |
|                        |        |       | 500  | 482         | 96.4 ± 3.53 |
|                        |        |       | 750  | 771         | 103 ± 3.58  |
| Mitra <sup>®</sup>     | ALB    | 10    | 9.34 | 93.4 ± 3.88 |             |
|                        |        | 100   | 99.0 | 99.0 ± 7.70 |             |
|                        |        | 150   | 146  | 97.3 ± 4.14 |             |
|                        | ALBON  | 5     | 4.85 | 97.1 ± 3.74 |             |
|                        |        | 100   | 99.7 | 99.7 ± 2.85 |             |
|                        |        | 150   | 159  | 106 ± 0.99  |             |
|                        | ALBOX  | 10    | 10.4 | 104 ± 6.44  |             |
|                        |        | 500   | 508  | 102 ± 1.52  |             |
|                        |        | 750   | 785  | 105 ± 1.06  |             |
| -80 °C<br>(2–3 months) | Plasma | ALB   | 5    | 4.35        | 87.0 ± 0.89 |
|                        |        |       | 100  | 105         | 105 ± 1.76  |
|                        |        |       | 150  | 161         | 107 ± 3.65  |
|                        |        | ALBON | 5    | 4.50        | 90.0 ± 1.23 |
|                        |        |       | 100  | 101         | 101 ± 2.83  |
|                        |        |       | 150  | 152         | 101 ± 4.44  |
|                        |        | ALBOX | 10   | 10.2        | 102 ± 3.32  |
|                        |        |       | 500  | 479         | 95.8 ± 2.34 |
|                        |        |       | 750  | 705         | 94.0 ± 2.59 |
|                        | Blood  | ALB   | 5    | 4.86        | 97.2 ± 2.05 |
|                        |        |       | 100  | 102         | 102 ± 5.49  |
|                        |        |       | 150  | 163         | 109 ± 6.01  |
|                        |        | ALBON | 5    | 4.76        | 95.2 ± 3.69 |
|                        |        |       | 100  | 109         | 109 ± 5.72  |
|                        |        |       | 150  | 165         | 110 ± 3.95  |
|                        |        | ALBOX | 10   | 10.7        | 107 ± 3.71  |
|                        |        |       | 500  | 537         | 107 ± 3.60  |
|                        |        |       | 750  | 795         | 106 ± 2.91  |
| DBS                    | ALB    | 10    | 9.89 | 98.9 ± 1.95 |             |
|                        |        | 100   | 101  | 101 ± 7.83  |             |
|                        |        | 150   | 150  | 99.9 ± 6.68 |             |
|                        | ALBON  | 5     | 4.64 | 92.7 ± 4.80 |             |

|                               |        |       |       |             |             |             |            |
|-------------------------------|--------|-------|-------|-------------|-------------|-------------|------------|
|                               |        |       | 100   | 97.2        | 97.2 ± 4.14 |             |            |
|                               |        |       | 150   | 145         | 96.5 ± 5.24 |             |            |
|                               |        | ALBOX | 10    | 9.72        | 97.2 ± 3.85 |             |            |
|                               |        |       | 500   | 499         | 99.9 ± 8.04 |             |            |
|                               |        |       | 750   | 754         | 100 ± 7.79  |             |            |
|                               | Mitra® | ALB   | 10    | 10.0        | 100 ± 3.14  |             |            |
|                               |        |       | 100   | 98.7        | 98.7 ± 3.73 |             |            |
|                               |        |       | 150   | 152         | 101 ± 2.89  |             |            |
|                               |        | ALBON | 5     | 5.00        | 100 ± 3.23  |             |            |
|                               |        |       | 100   | 96.5        | 96.5 ± 4.78 |             |            |
|                               |        |       | 150   | 155         | 103 ± 4.23  |             |            |
|                               |        | ALBOX | 10    | 10.2        | 102 ± 5.20  |             |            |
|                               |        |       | 500   | 516         | 103 ± 4.86  |             |            |
|                               |        |       | 750   | 770         | 103 ± 5.40  |             |            |
| Freeze/thaw<br>cycles<br>(3x) | Plasma | ALB   | 5     | 4.87        | 97.5 ± 2.11 |             |            |
|                               |        |       | 100   | 101         | 101 ± 0.94  |             |            |
|                               |        |       | 150   | 162         | 108 ± 0.36  |             |            |
|                               |        |       | ALBON | 5           | 4.83        | 96.6 ± 5.96 |            |
|                               |        |       |       | 100         | 99.0        | 99.0 ± 3.41 |            |
|                               |        |       |       | 150         | 166         | 110 ± 2.37  |            |
|                               |        |       | ALBOX | 10          | 9.03        | 90.3 ± 7.56 |            |
|                               |        |       |       | 500         | 476         | 95.1 ± 4.17 |            |
|                               |        |       |       | 750         | 758         | 101 ± 2.48  |            |
|                               | Blood  | ALB   | 5     | 4.66        | 93.3 ± 2.87 |             |            |
|                               |        |       | 100   | 101         | 101 ± 1.59  |             |            |
|                               |        |       | 150   | 153         | 102 ± 1.11  |             |            |
|                               |        |       |       | ALBON       | 5           | 5.30        | 106 ± 0.93 |
|                               |        |       |       |             | 100         | 106         | 105 ± 2.02 |
|                               |        |       |       |             | 150         | 167         | 111 ± 7.21 |
|                               |        |       | ALBOX | 10          | 10.4        | 104 ± 7.68  |            |
|                               |        |       |       | 500         | 501         | 100 ± 1.03  |            |
|                               |        |       |       | 750         | 787         | 105 ± 5.75  |            |
| DBS                           | ALB    | 10    | 9.90  | 99.0 ± 1.91 |             |             |            |
|                               |        | 100   | 106   | 106 ± 8.14  |             |             |            |
|                               |        | 150   | 157   | 105 ± 6.51  |             |             |            |
|                               |        |       | ALBON | 5           | 4.79        | 95.7 ± 1.58 |            |
|                               |        |       |       | 100         | 98.8        | 98.8 ± 2.26 |            |
|                               |        |       |       | 150         | 150         | 100 ± 8.76  |            |
|                               |        |       | ALBOX | 10          | 10.1        | 101 ± 3.30  |            |
|                               |        |       |       | 500         | 477         | 95.3 ± 4.11 |            |
|                               |        |       |       | 750         | 712         | 94.9 ± 6.07 |            |
